# Supplementary material
Source: PubMed Central journal article supplement (PMC7272265)

Fig. S1

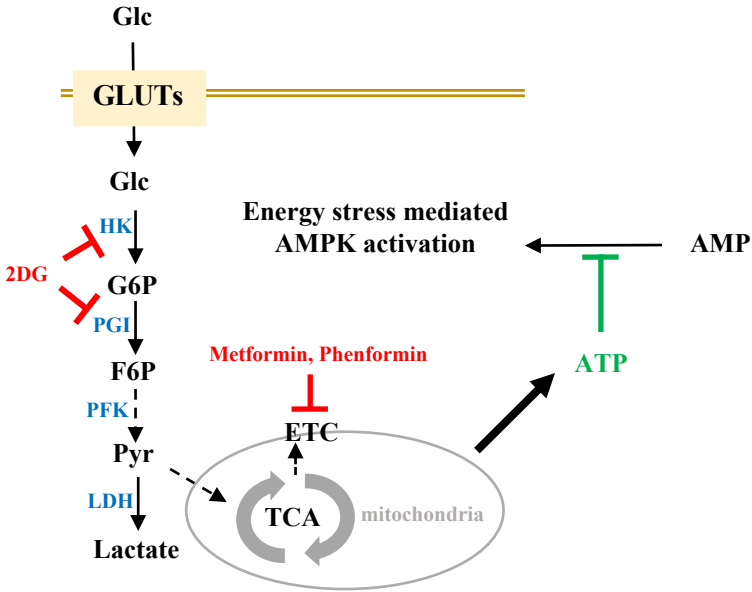

**Fig. S2**

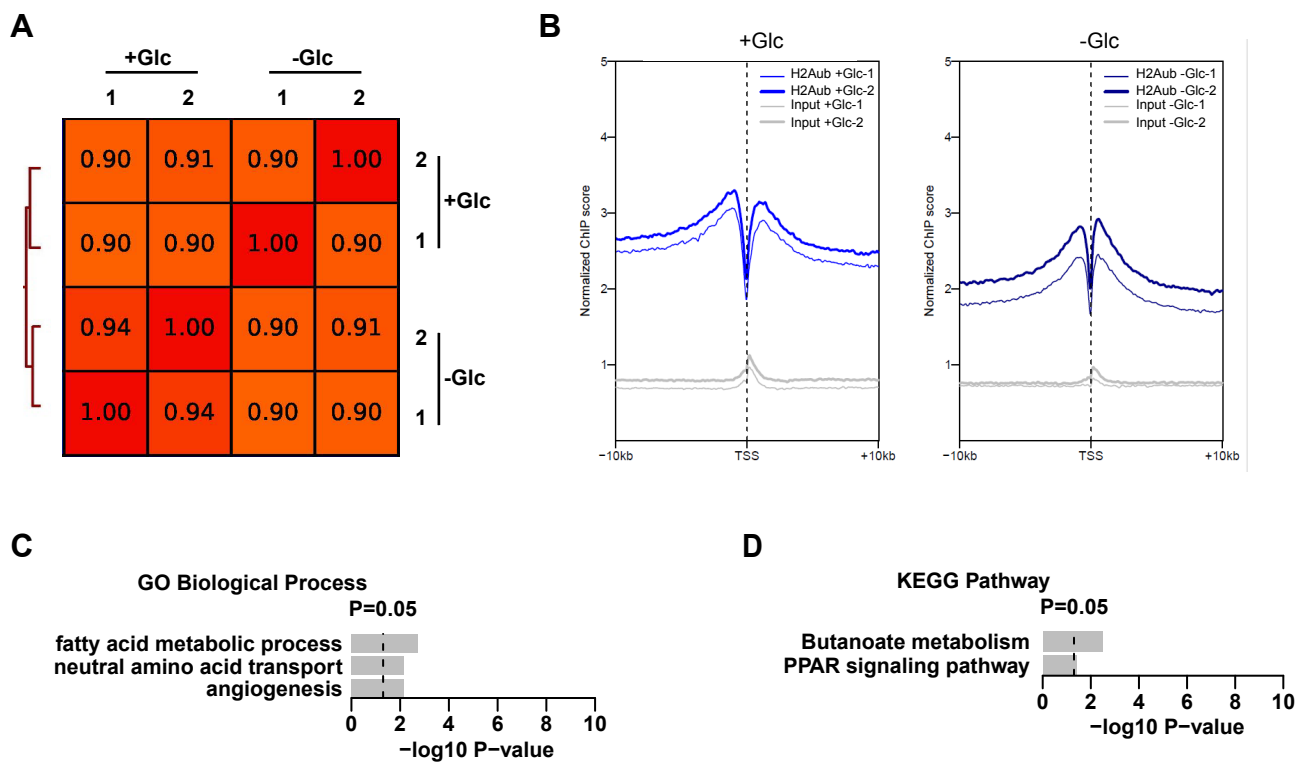

**Fig. S3**

**A**

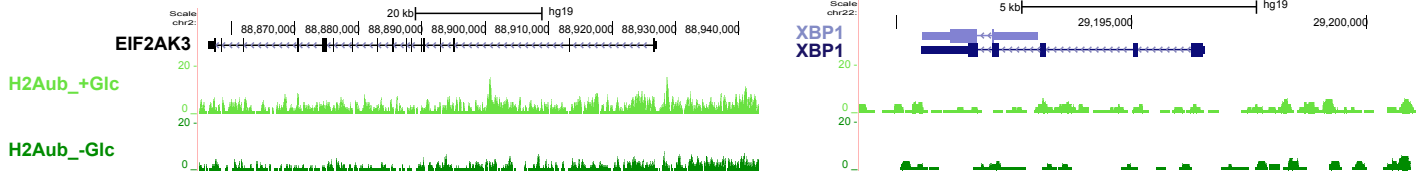

**B**

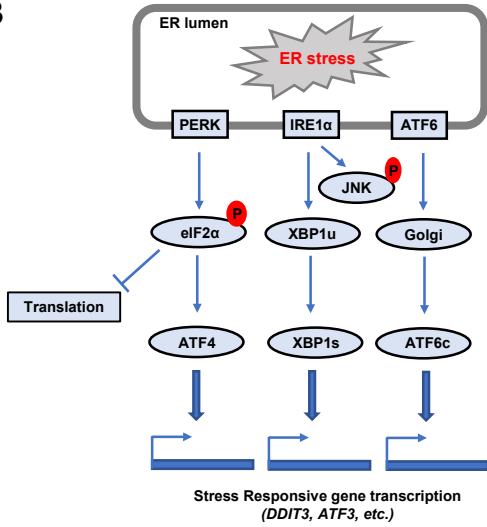

**C**

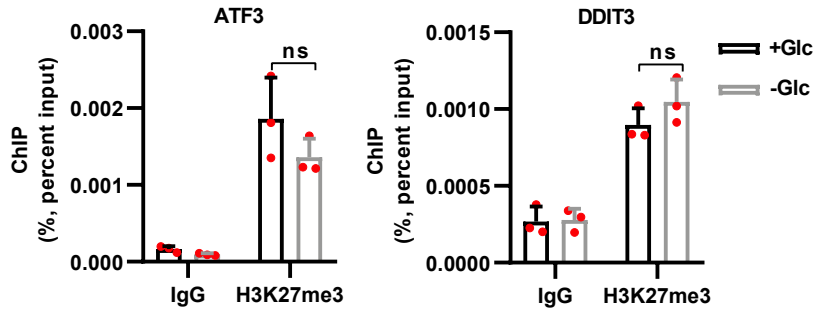

**D**

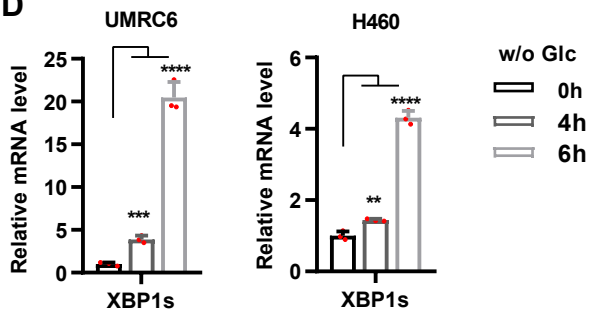

**E**

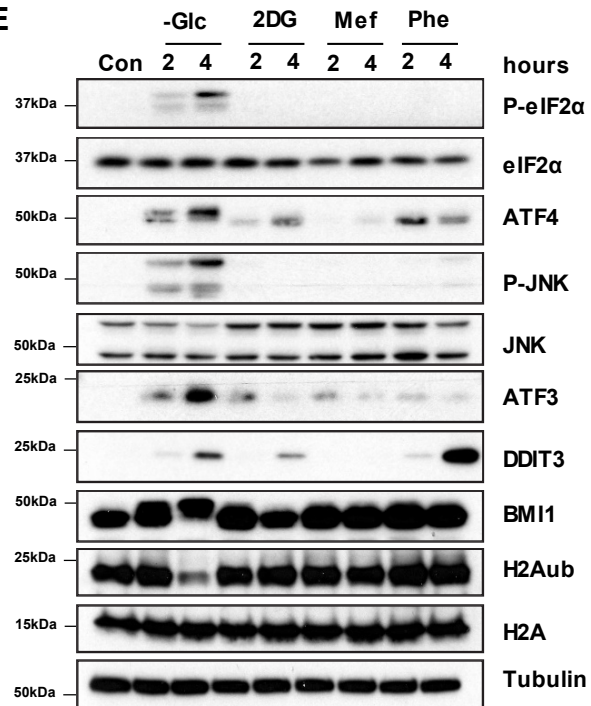

**Fig. S4**

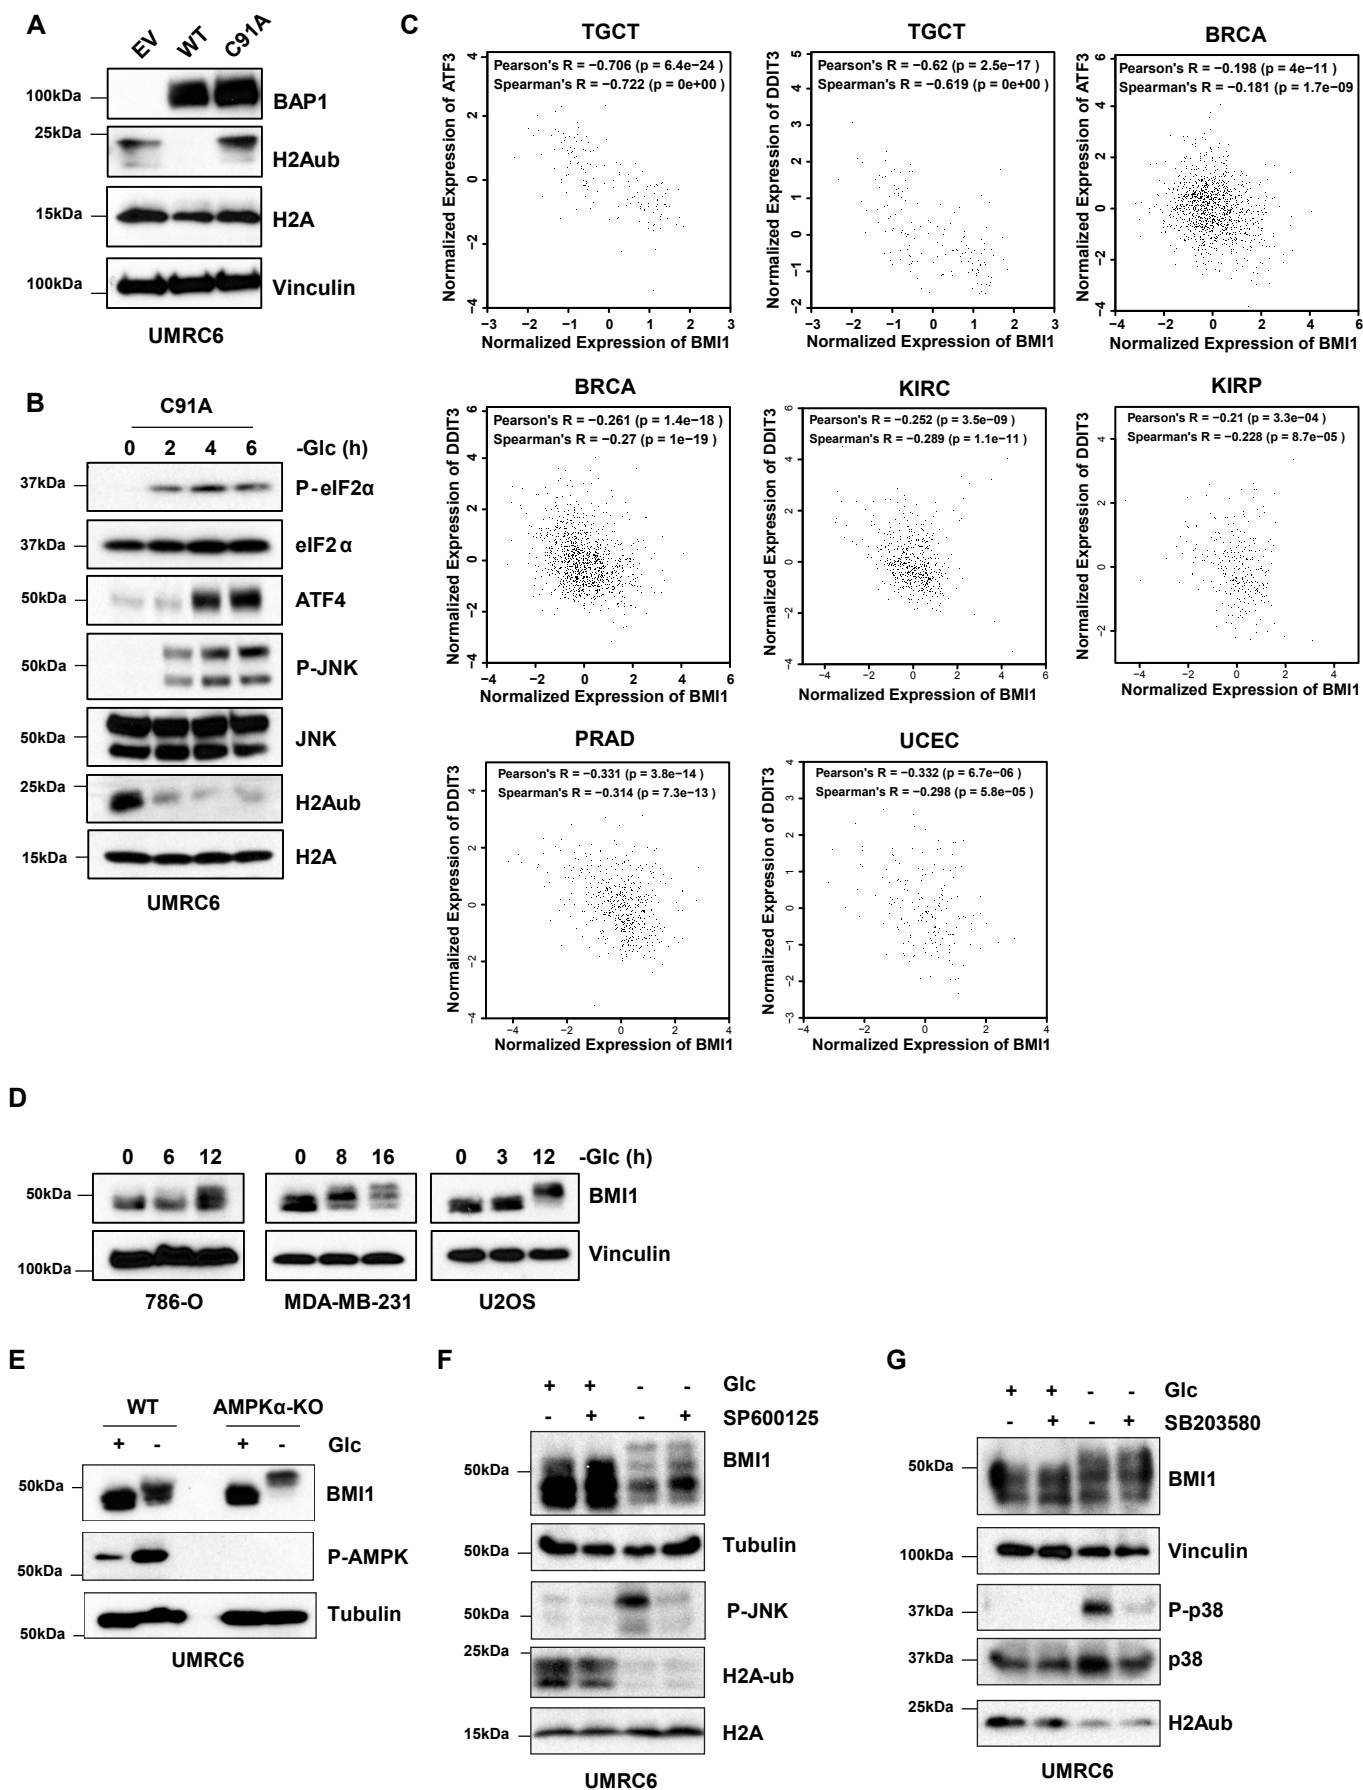

**Fig. S5**

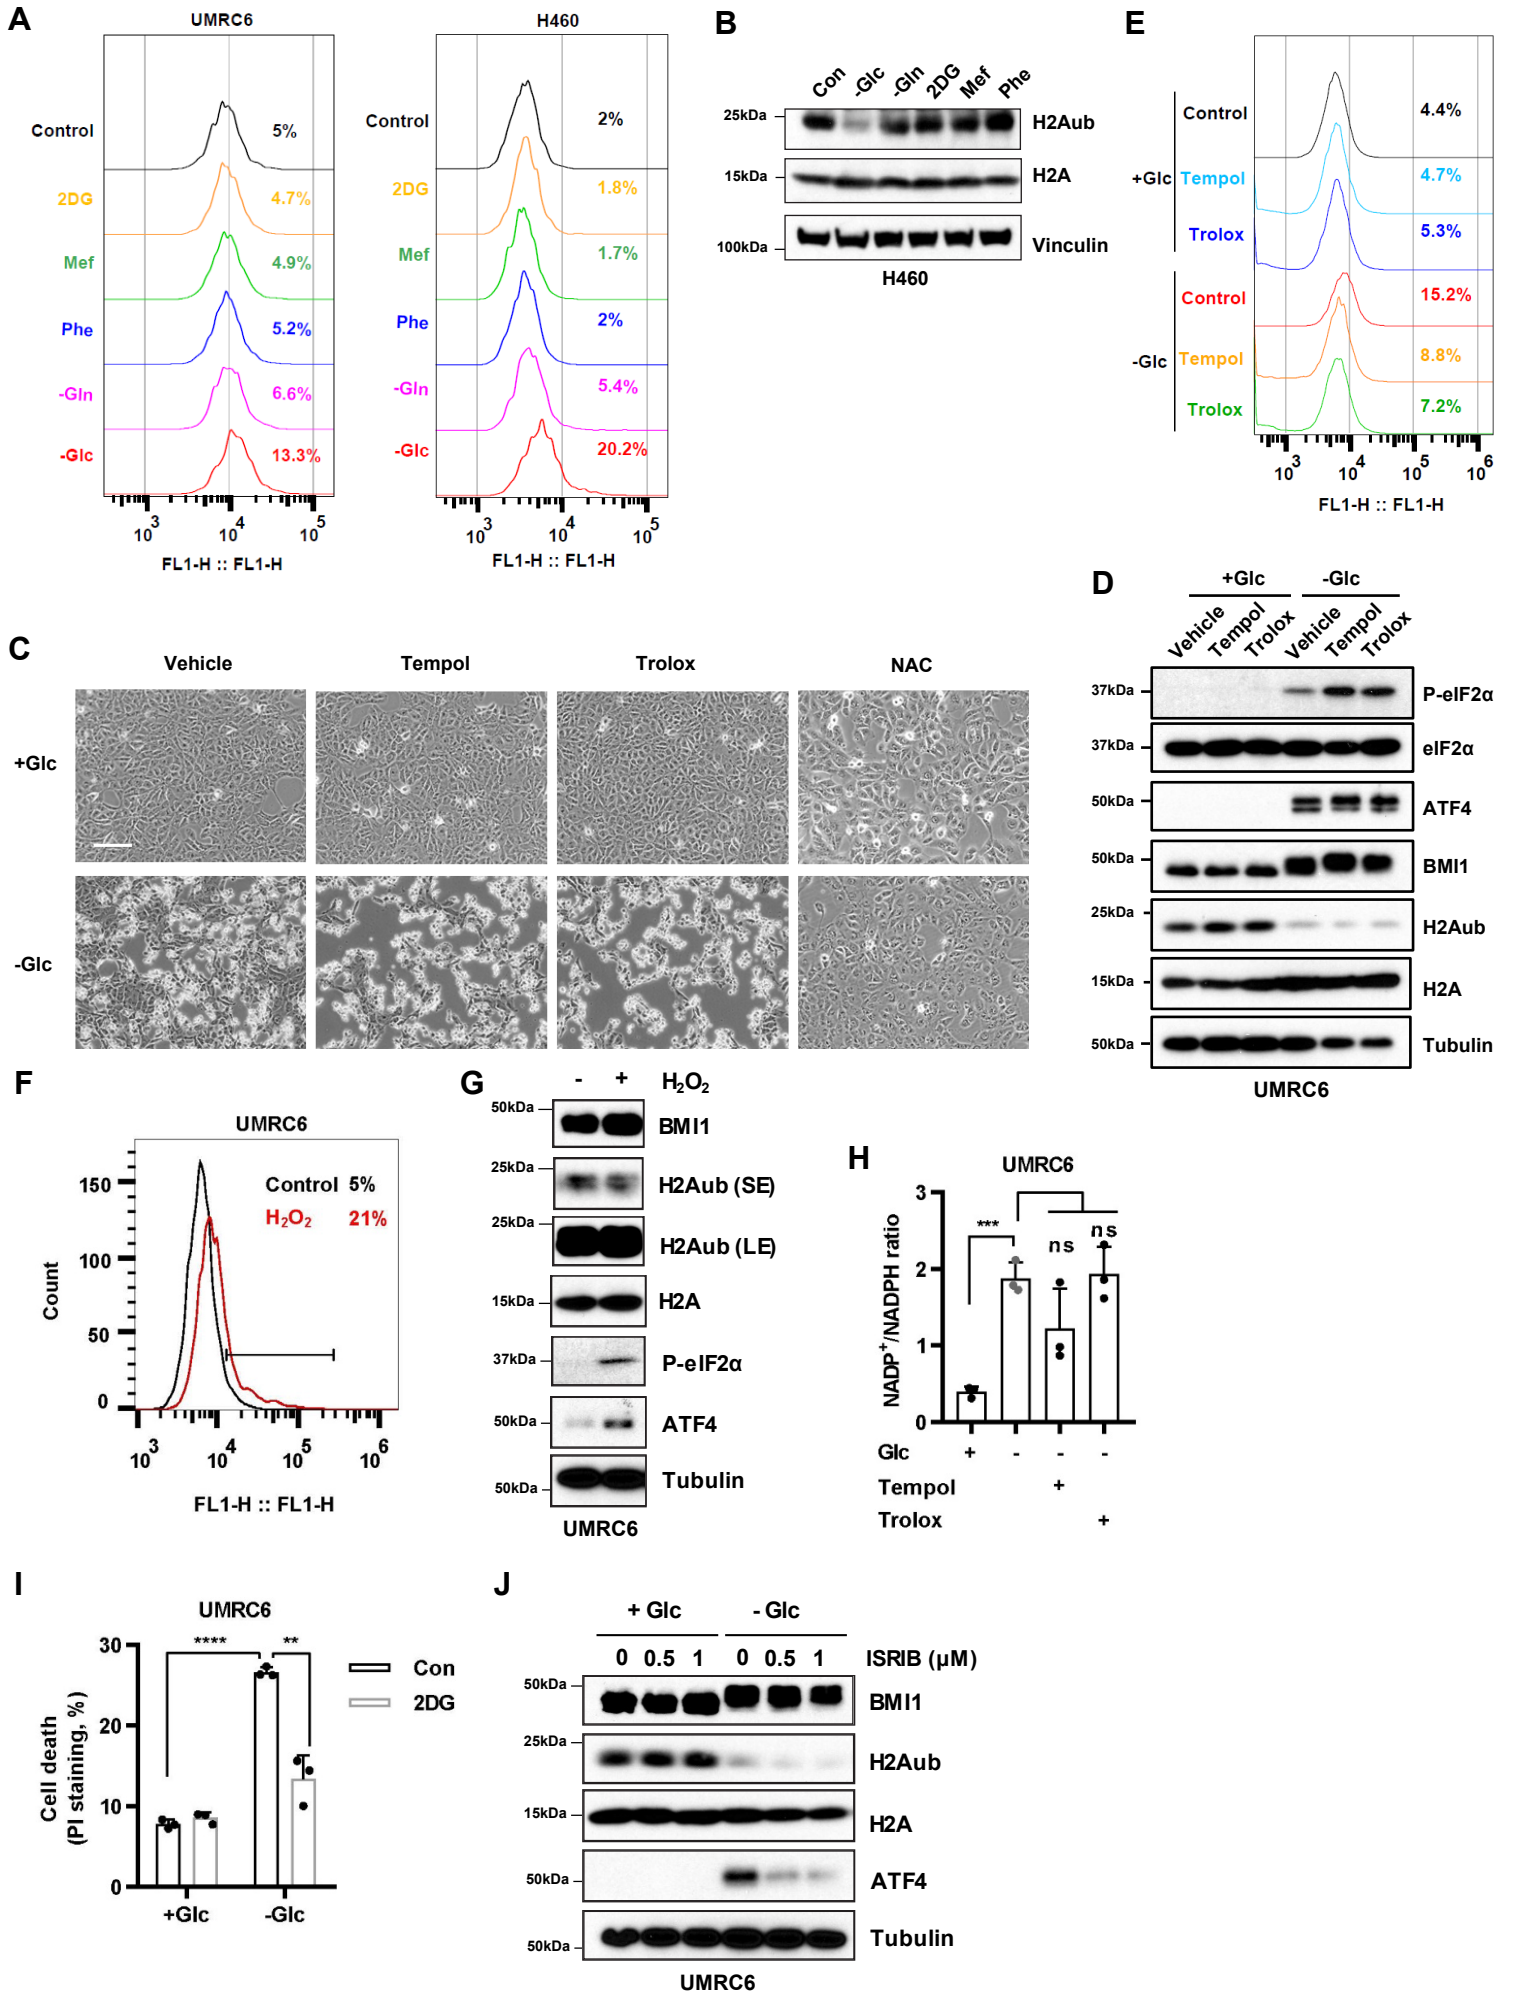

Fig. S6

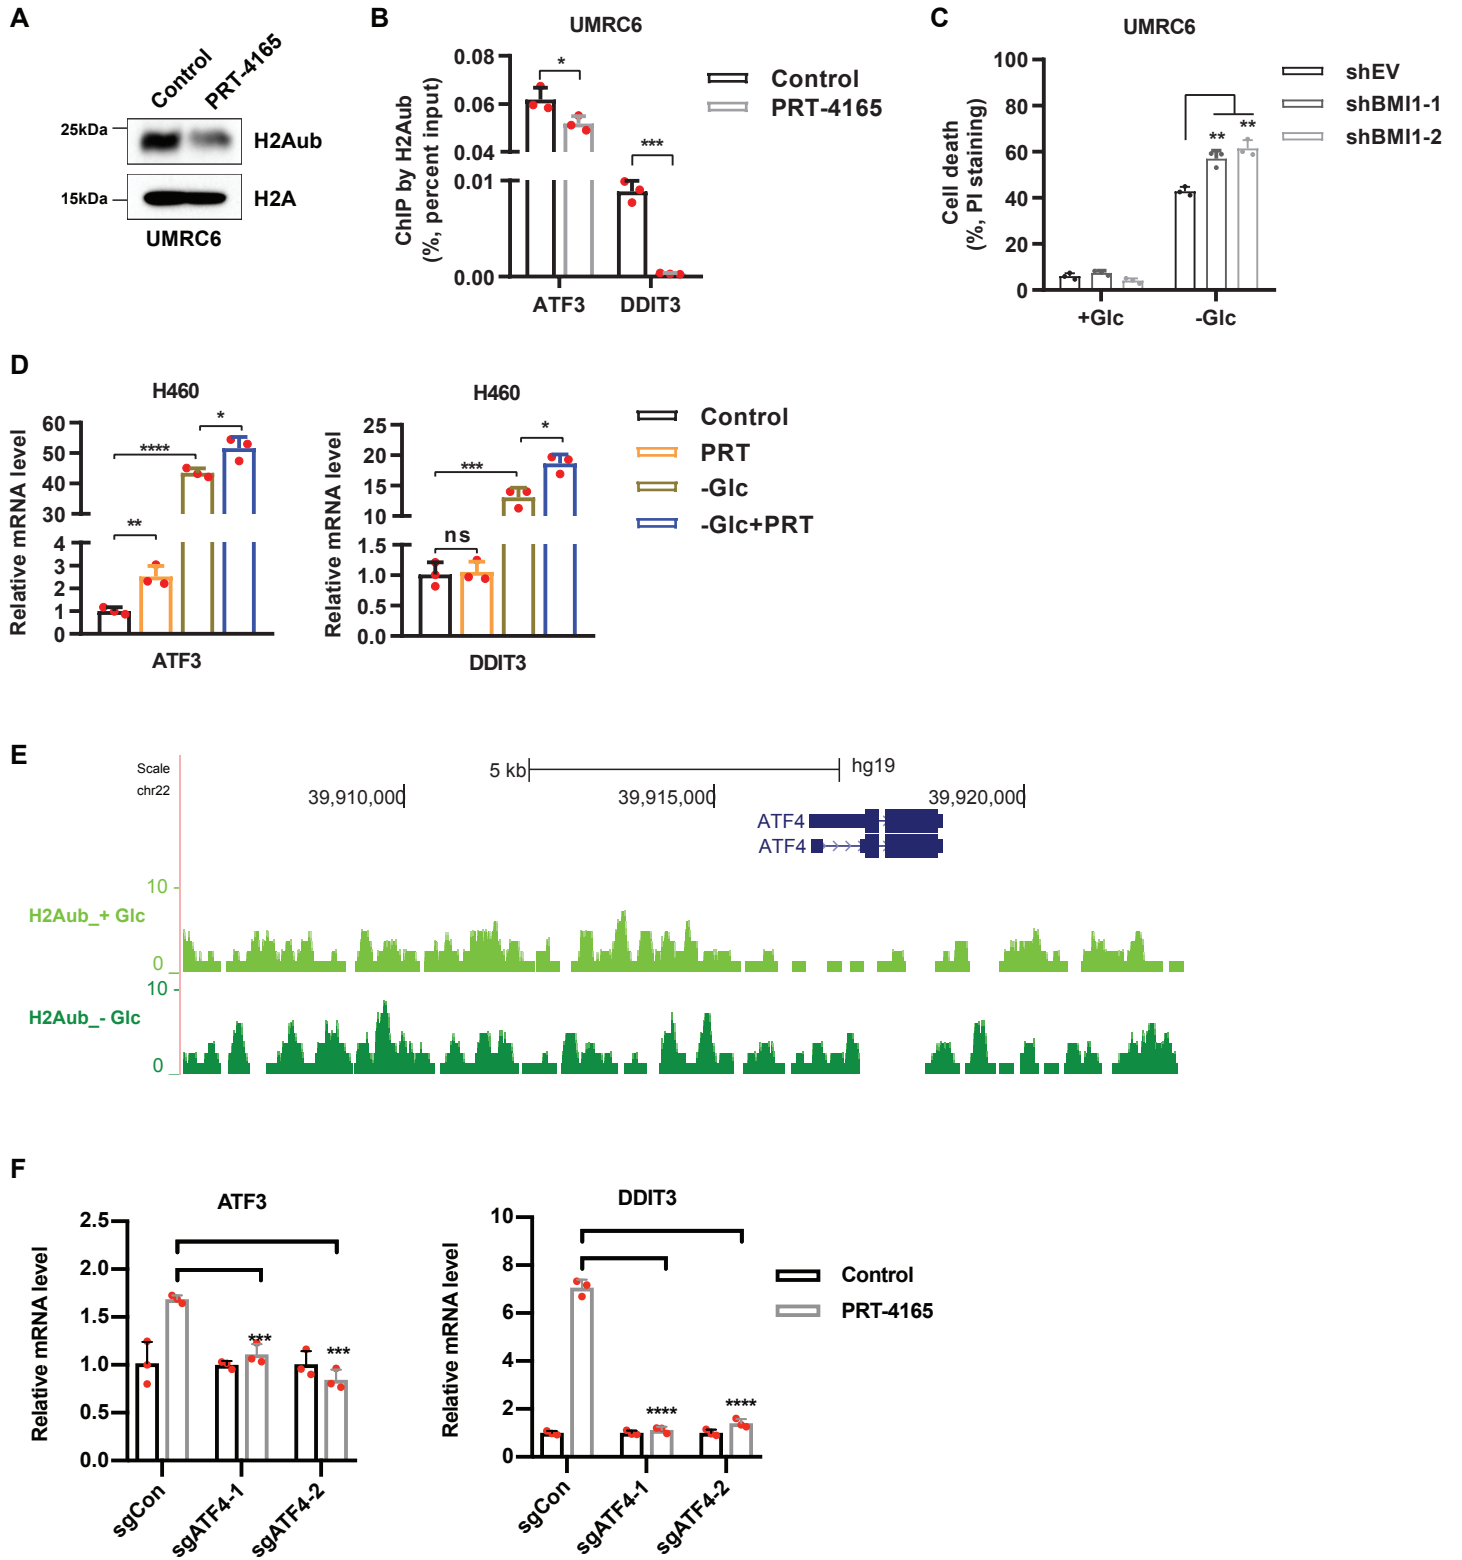

Fig. S7

A

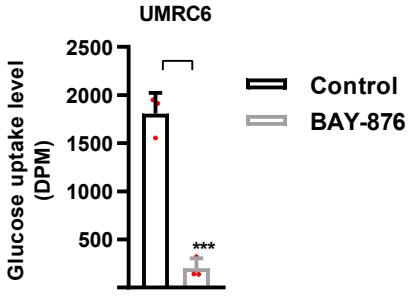

B

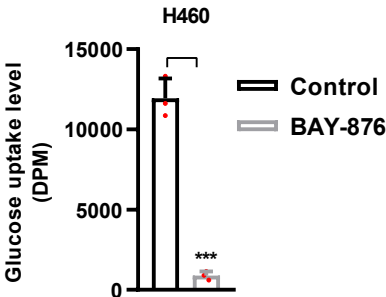

C

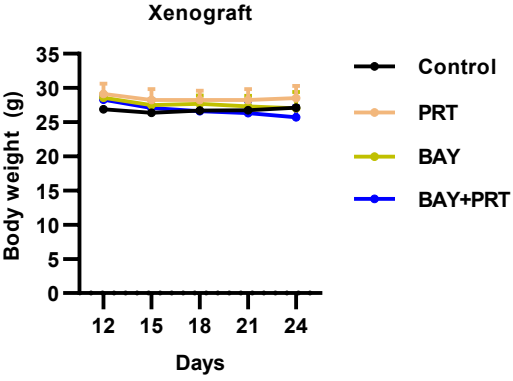

Fig. S8

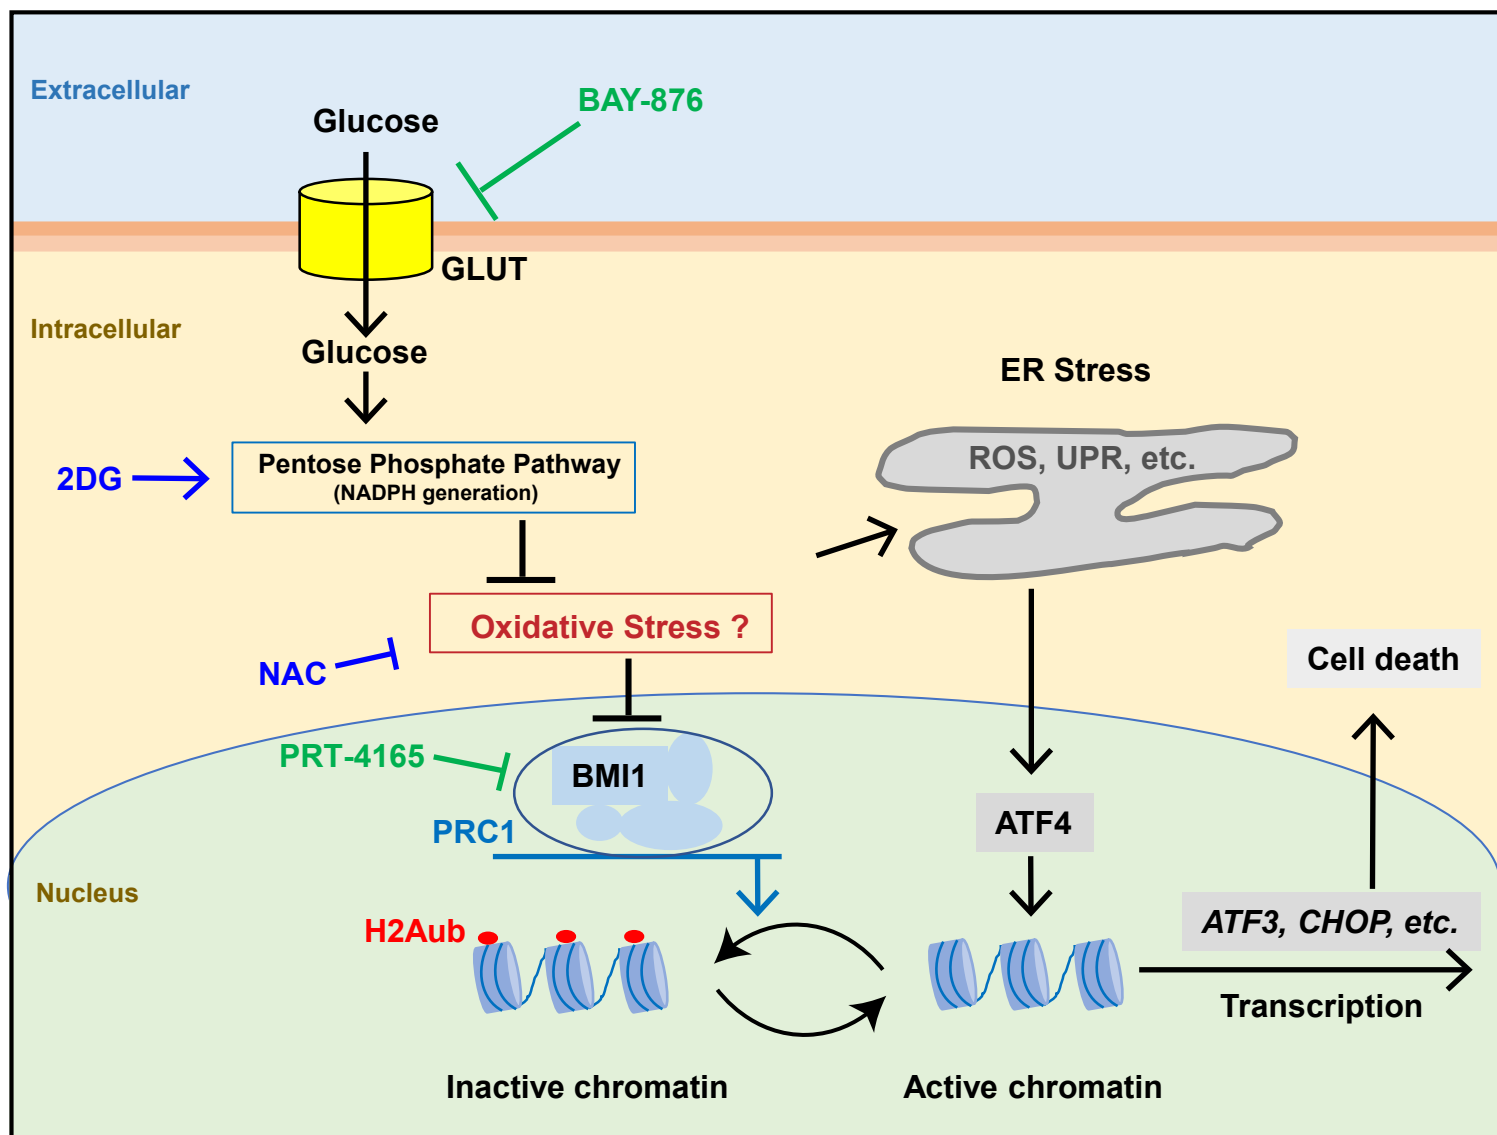

Supplement: NIHMS1584552-supplement-1.pdf [file NIHMS1584552-supplement-1.pdf]
